# Supplementary material for: Water-in-bisalt electrolytes with mixed hydrophilic and hydrophobic anions for enhanced transport and stability for potassium-ion batteries
Source: Royal Society of Chemistry journal article supplement (doi:10.1039/d4ra08378d), 2025-01-01
Supplement: d4ra08378d1.pdf [file d4ra08378d1.pdf]

## Supporting Information

### Water-in-Bisalt Electrolytes with Mixed Hydrophilic and Hydrophobic Anions for Enhanced Transport and Stability for Potassium-ion Batteries

Mukhilan Dhasarathaboopathy, Palani Sabhapathy<sup>a</sup>, Burcu Gurkan\*

Department of Chemical & Biomolecular Engineering, Case Western Reserve University,  
Cleveland, Ohio 44106

\* Corresponding: beg23@case.edu

**Table S1.** Physicochemical properties of the KAc/H<sub>2</sub>O, KOTf/H<sub>2</sub>O and the KAc/KOTf binary mixtures

| Solution                                                        | Molarity<br>(mol L <sup>-1</sup> ) | Salt molar<br>fraction<br>(%) | Density<br>(g.cm <sup>-3</sup> ) | Viscosity<br>(mPa.s) | Conductivity<br>(mS.cm <sup>-1</sup> ) |
|-----------------------------------------------------------------|------------------------------------|-------------------------------|----------------------------------|----------------------|----------------------------------------|
| 1 m KAc                                                         | 0.9                                | 1.7                           | 1.03                             | 1.45                 | 68.7                                   |
| 10 m KAc                                                        | 6.4                                | 15.2                          | 1.28                             | 5.78                 | 127.4                                  |
| 20 m KAc                                                        | 9.1                                | 26.4                          | 1.36                             | 17.13                | 62.8                                   |
| 30 m KAc                                                        | 10.8                               | 35                            | 1.42                             | 44.69                | 27.5                                   |
| 1 m KOTf                                                        | 0.8                                | 1.7                           | 1.02                             | 1.24                 | 72.4                                   |
| 10 m KOTf                                                       | 5.1                                | 15.2                          | 1.47                             | 3.82                 | 123.3                                  |
| 18 m KOTf                                                       | 6.7                                | 24.5                          | 1.64                             | 8.33                 | 78                                     |
| K(Ac) <sub>0.3</sub> (OTf) <sub>0.7</sub> .3.2H <sub>2</sub> O  | 7.3                                | 23.5                          | 1.62                             | 10.61                | 79.7                                   |
| K(Ac) <sub>0.5</sub> (OTf) <sub>0.5</sub> .2.9H <sub>2</sub> O  | 8                                  | 25.6                          | 1.57                             | 14.04                | 67.1                                   |
| K(Ac) <sub>0.7</sub> (OTf) <sub>0.3</sub> .2.78H <sub>2</sub> O | 8.5                                | 26.4                          | 1.5                              | 18.28                | 61.7                                   |
| <b>K(Ac)<sub>0.9</sub>(OTf)<sub>0.1</sub>.1.5H<sub>2</sub>O</b> | 10.9                               | 39.4                          | 1.48                             | 87.1                 | 18.07                                  |

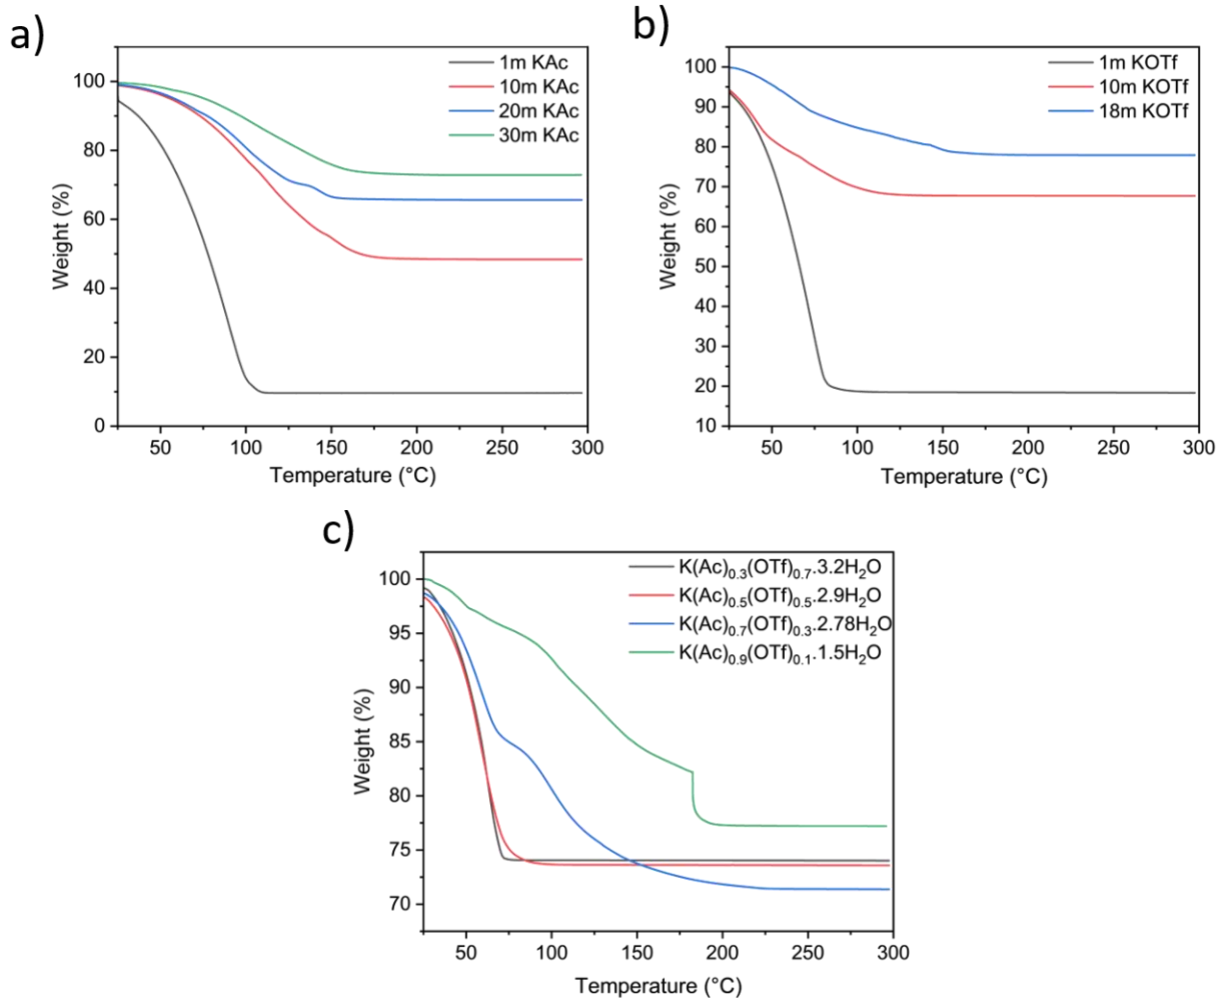

**Figure S1.** TGA curves of aqueous KAc (a), KOTf (b), and KAc/KOTf binary (c) electrolytes

**Table S2.** Salt weight percentages of the prepared aqueous samples calculated stoichiometrically and measured experimentally from TGA curves shown in Figure S1.

| Sample Solution                                                            | Salt weight percentage (%)  |                    |
|----------------------------------------------------------------------------|-----------------------------|--------------------|
|                                                                            | Calculated (stoichiometric) | Experimental (TGA) |
| 1 m KAc                                                                    | 9.6                         | 9                  |
| 10 m KAc                                                                   | 48.3                        | 49.5               |
| 20 m KAc                                                                   | 65.6                        | 66.2               |
| 30 m KAc                                                                   | 72.8                        | 74.6               |
| 1 m KOTf                                                                   | 15.8                        | 16.1               |
| 10 m KOTf                                                                  | 65.2                        | 67.7               |
| 18 m KOTf                                                                  | 77.2                        | 77.9               |
| $\text{K}(\text{Ac})_{0.3}(\text{OTf})_{0.7} \cdot 3.2\text{H}_2\text{O}$  | 73.3                        | 74                 |
| $\text{K}(\text{Ac})_{0.5}(\text{OTf})_{0.5} \cdot 2.9\text{H}_2\text{O}$  | 73.2                        | 73.5               |
| $\text{K}(\text{Ac})_{0.7}(\text{OTf})_{0.3} \cdot 2.78\text{H}_2\text{O}$ | 71.4                        | 71.3               |
| $\text{K}(\text{Ac})_{0.9}(\text{OTf})_{0.1} \cdot 1.5\text{H}_2\text{O}$  | 79.4                        | 77.2               |

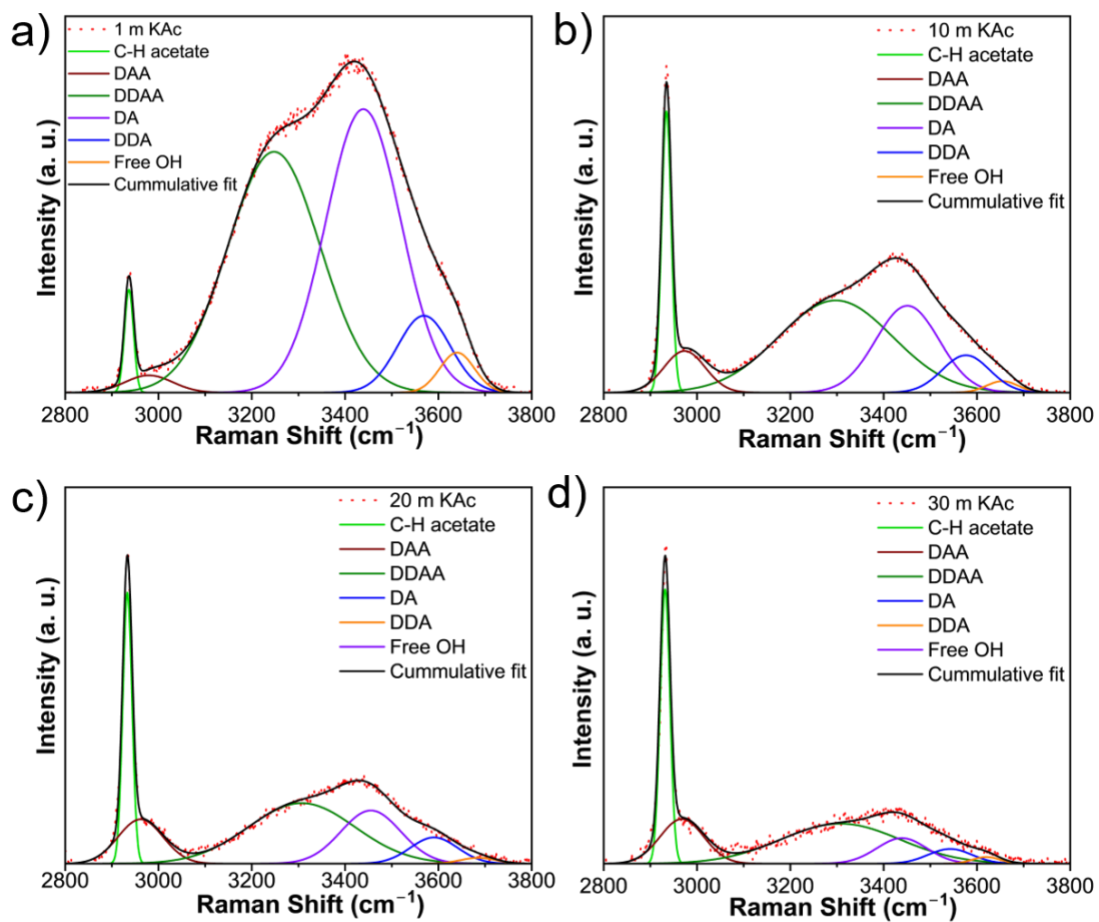

**Figure S2.** Raman spectra of 1 m KAc (a), 10 m KAc (b), 20 m KAc (c) and 30 m KAc (d) with fitted peaks corresponding to the OH symmetric stretching vibrations of water molecules.

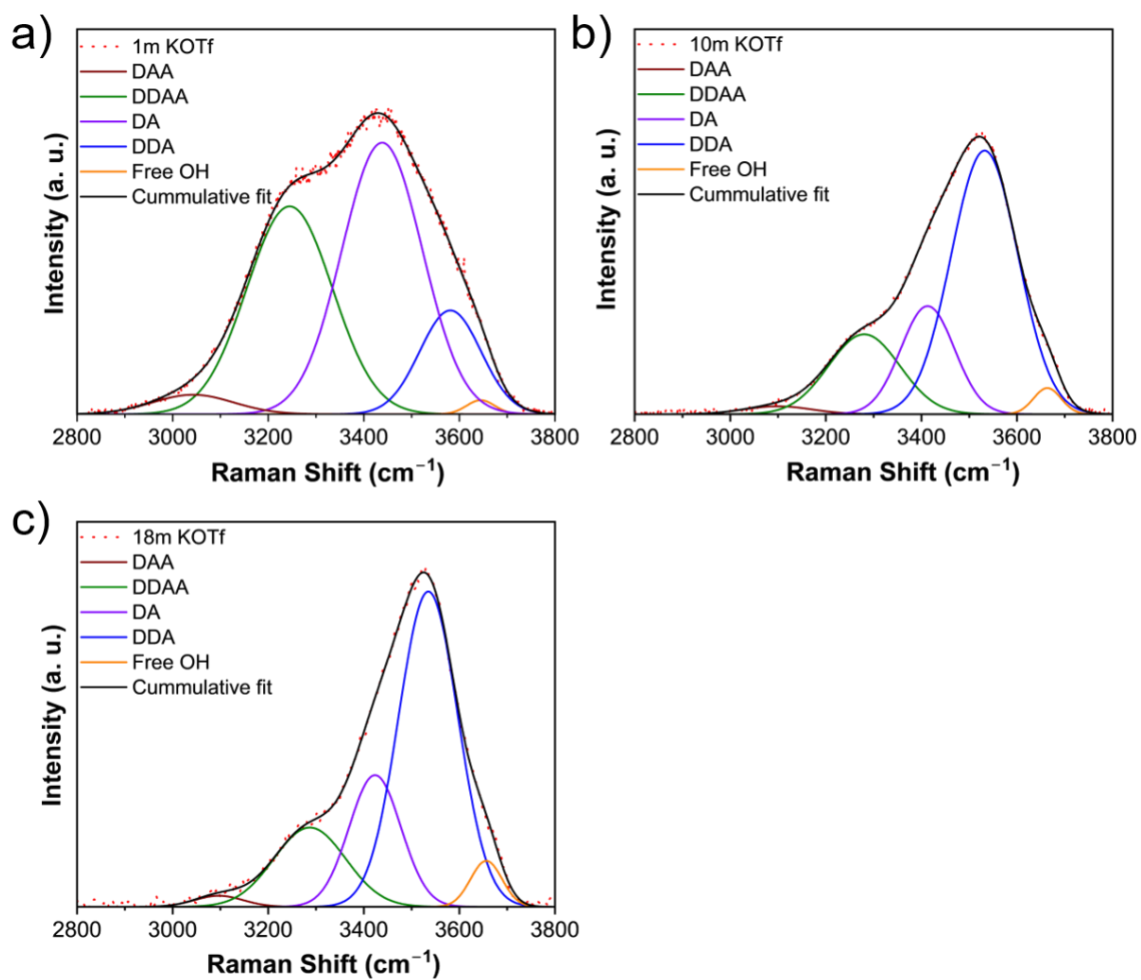

**Figure S3.** Raman spectra of 1 m KOTf (a), 10 m KOTf (b) and 18 m KOTf (c) with fitted peaks corresponding to the OH symmetric stretching vibrations of water molecules

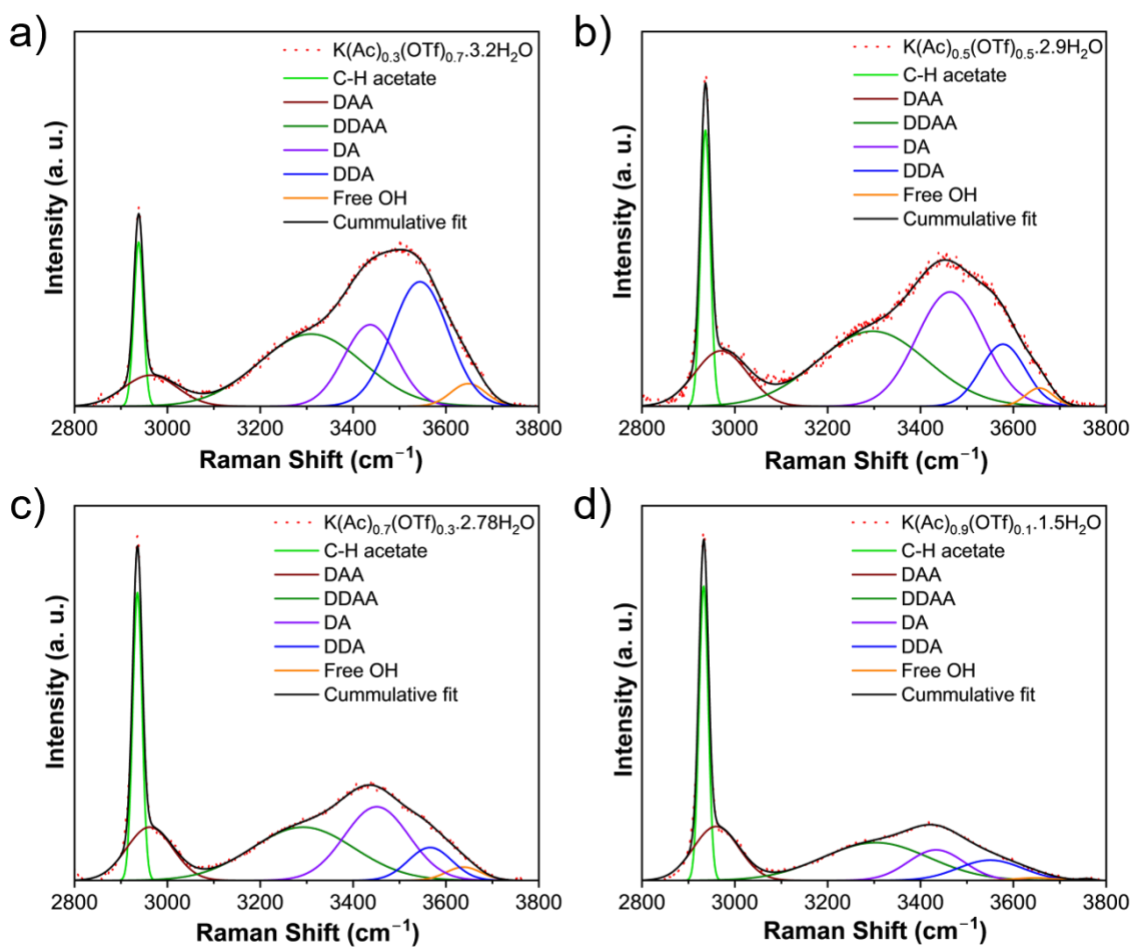

**Figure S4.** Raman spectra of WiS binary solutions  $\text{K}(\text{Ac})_{0.3}(\text{OTf})_{0.7} \cdot 3.2\text{H}_2\text{O}$  (a),  $\text{K}(\text{Ac})_{0.5}(\text{OTf})_{0.5} \cdot 2.9\text{H}_2\text{O}$  (b),  $\text{K}(\text{Ac})_{0.7}(\text{OTf})_{0.3} \cdot 2.78\text{H}_2\text{O}$  (c), and  $\text{K}(\text{Ac})_{0.9}(\text{OTf})_{0.1} \cdot 1.5\text{H}_2\text{O}$  (d) with fitted peaks corresponding to the OH symmetric stretching vibrations of water molecules

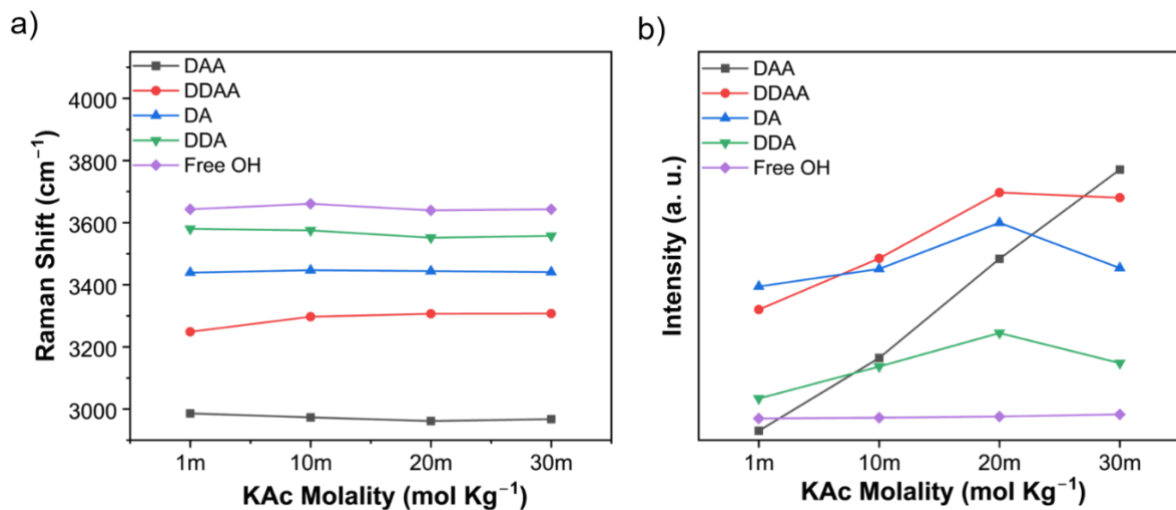

**Figure S5.** Raman shifts (a) and intensities (b) of DAA, DDAA, DA, DDA, free OH symmetric stretching vibration peaks for KAc electrolytes

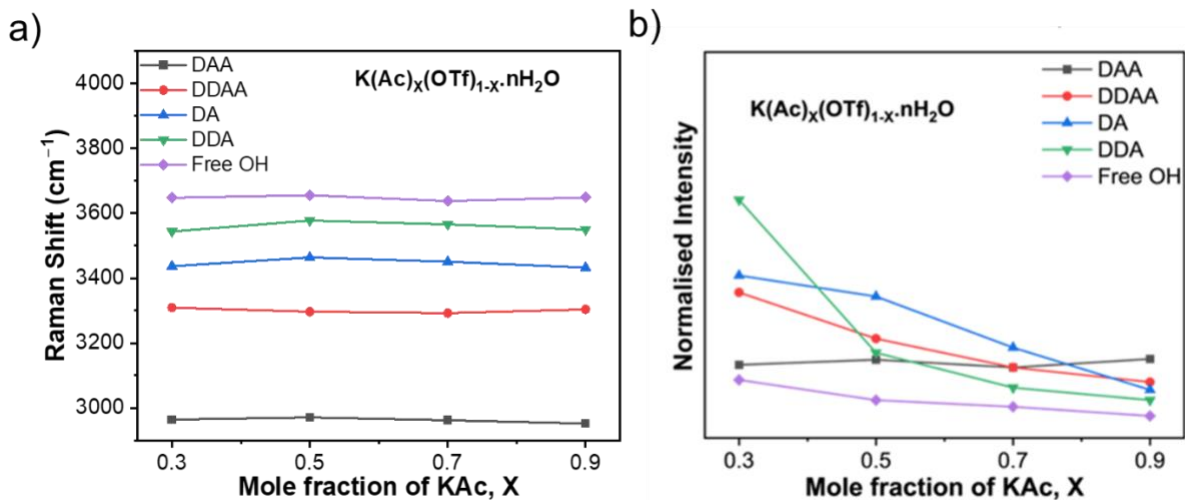

**Figure S6.** a) Raman shifts of DAA, DDAA, DA, DDA, and free OH symmetric stretching vibrations in WIBS electrolyte as a functional of KAc mole fraction ranging from  $K(Ac)_{0.3}(OTf)_{0.7} \cdot 3.2H_2O$ ,  $K(Ac)_{0.5}(OTf)_{0.5} \cdot 2.9H_2O$  to  $K(Ac)_{0.7}(OTf)_{0.3} \cdot 2.78H_2O$  to  $K(Ac)_{0.9}(OTf)_{0.1} \cdot 1.5H_2O$  (32Ac:4OTf); b) Normalized Raman intensity of vibrations due to water

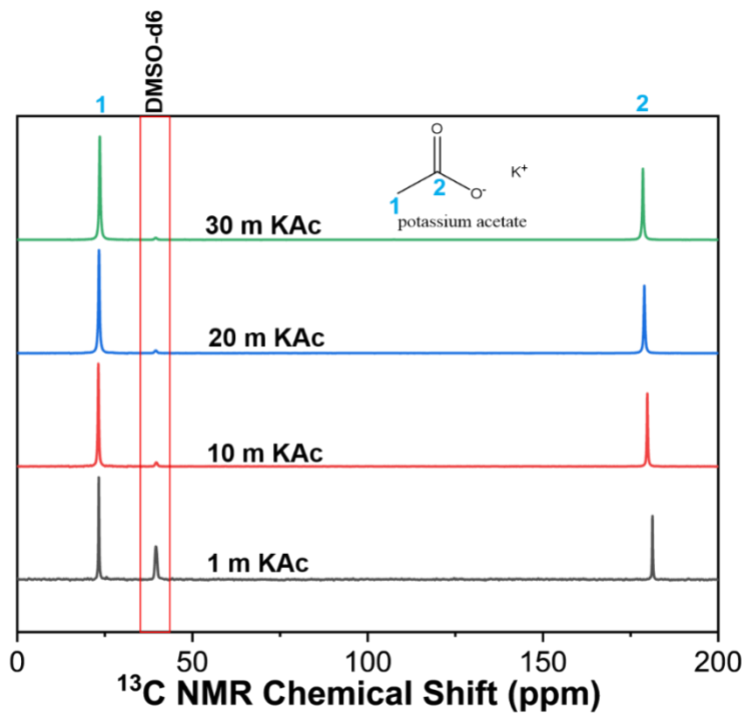

**Figure S7.**  $^{13}\text{C}$  NMR spectra for KAc electrolytes at increasing concentrations

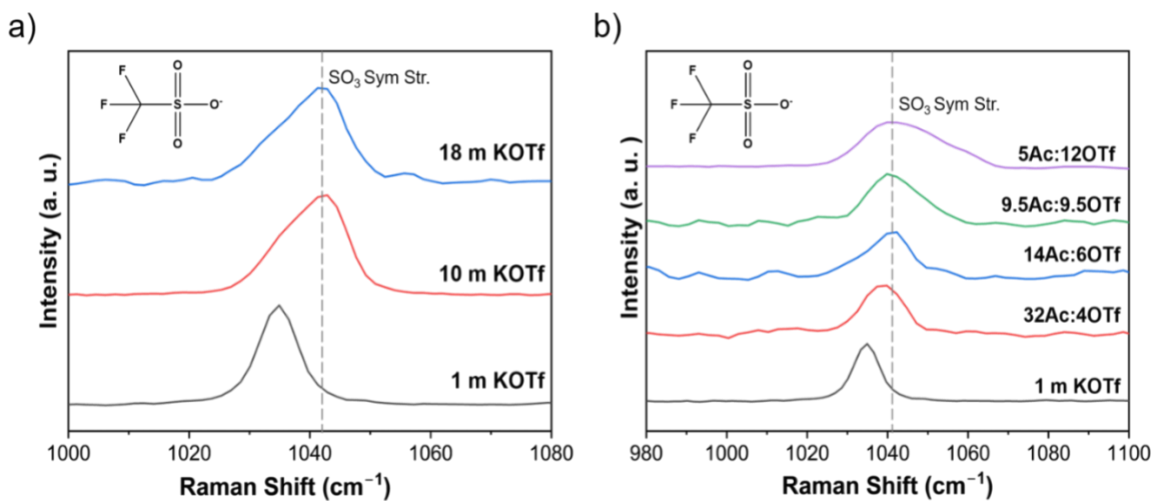

**Figure S8.** a) Raman peaks of  $\text{SO}_3$  symmetric stretching in KOTf with increasing concentrations of OTf; b) Raman peaks of  $\text{SO}_3$  symmetric stretching in KOTf for mixtures with increasing concentrations of OTf.



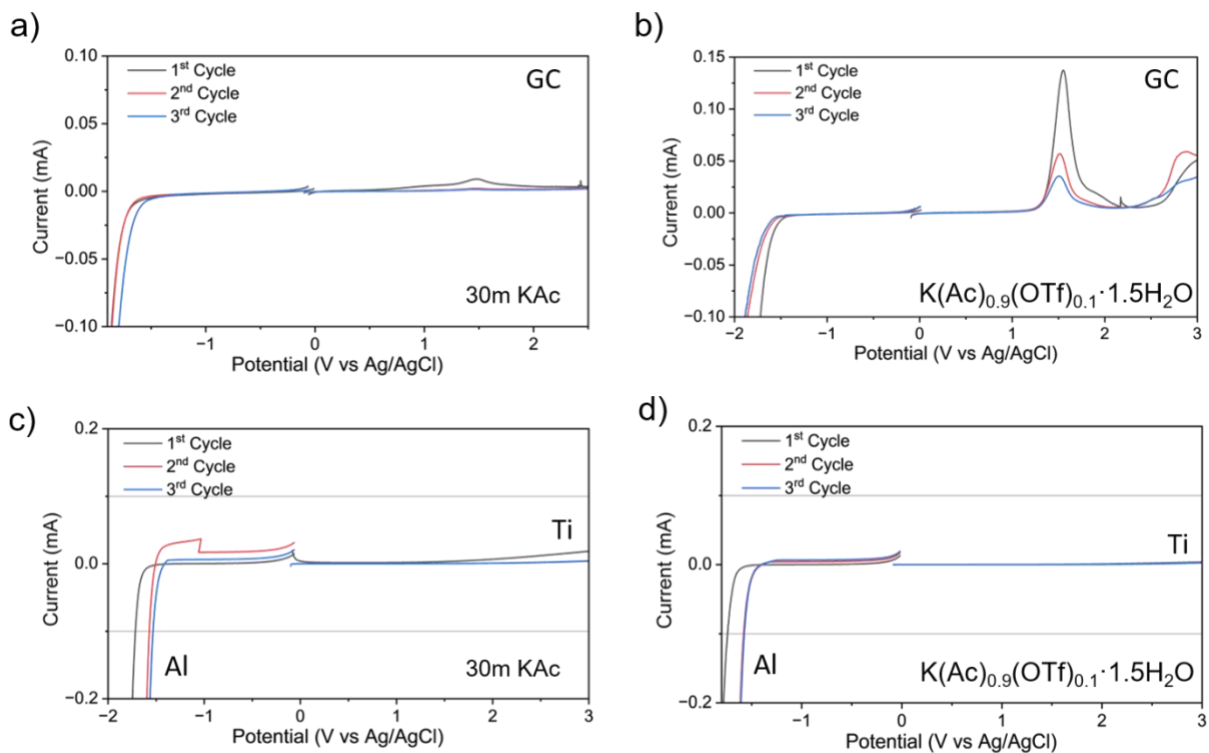

**Figure S9.** Linear sweep voltammograms of the 1<sup>st</sup>, 2<sup>nd</sup> and 3<sup>rd</sup> cycles for 30m KAc (a and c), and  $K(Ac)_{0.9}(OTf)_{0.1} \cdot 1.5H_2O$  (b and d). Panels a and b are with glassy carbon electrode; c and d with aluminum for negative sweep and titanium for positive sweep as marked.
